# Supplementary material for: The DREAM complex through its subunit Lin37 cooperates with Rb to initiate quiescence
Source: PubMed Central journal article supplement (PMC5602299; doi:10.7554/elife.26876), 2017-09-18

Figure 5-figure supplement 1

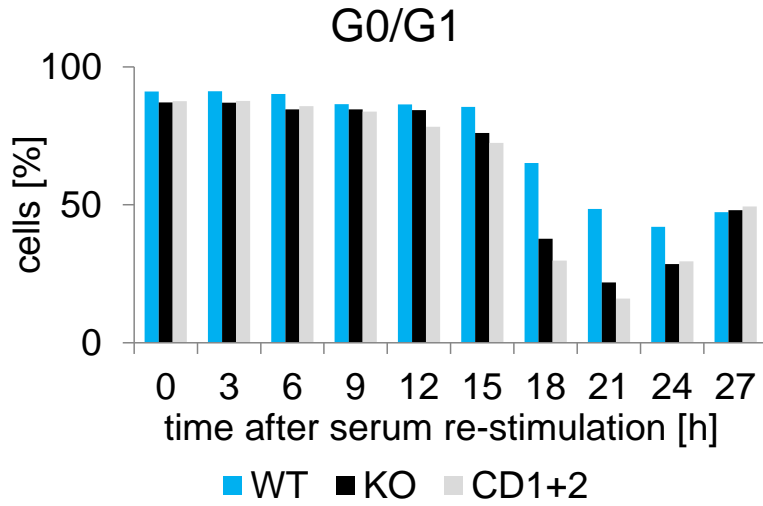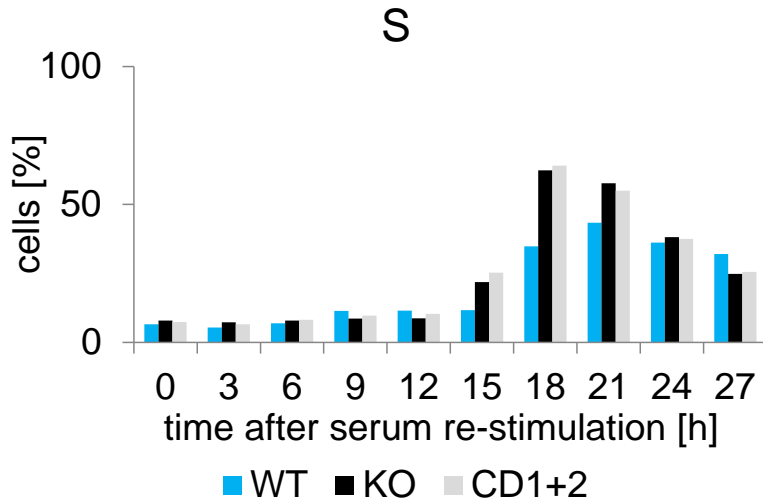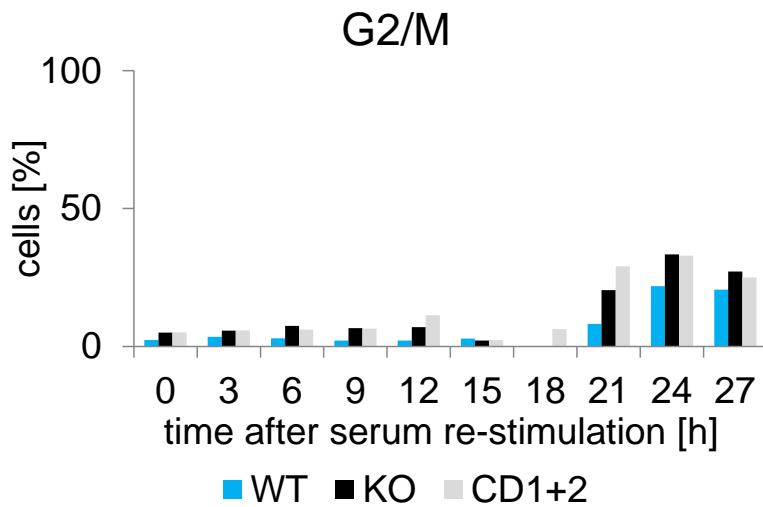

WT

KO

CD1+2

0h

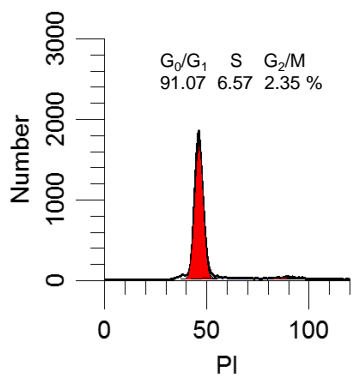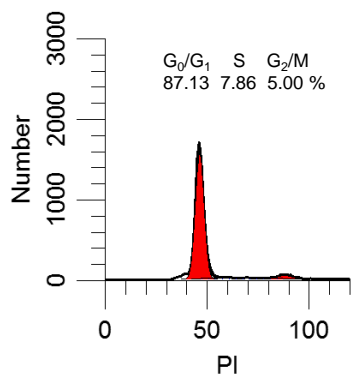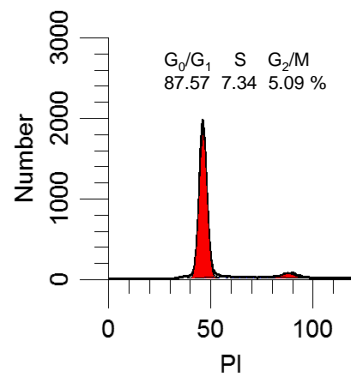

3h

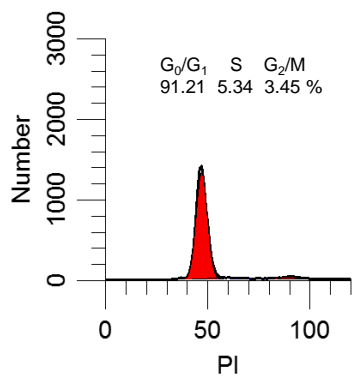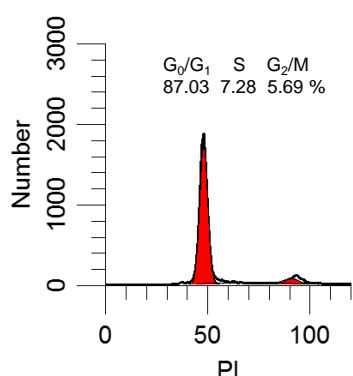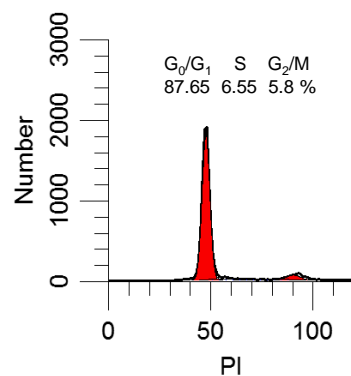

6h

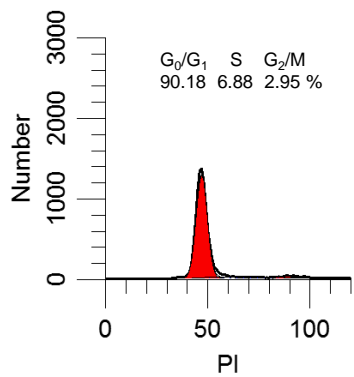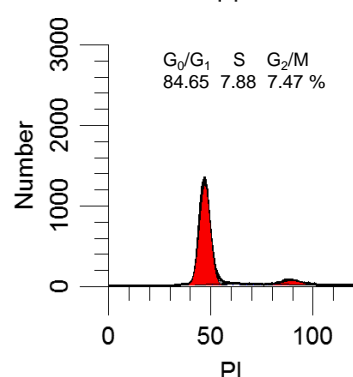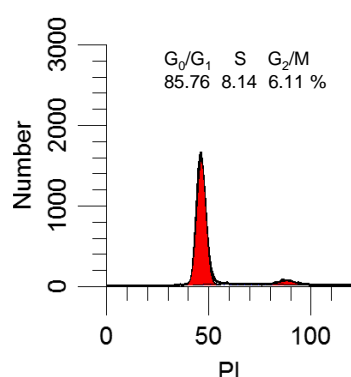

9h

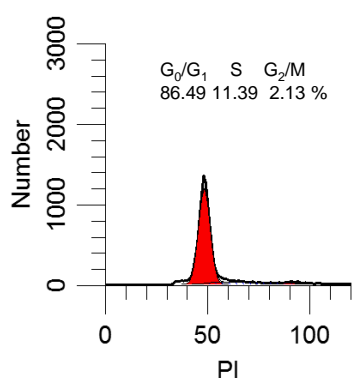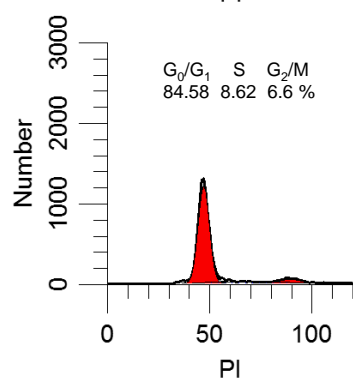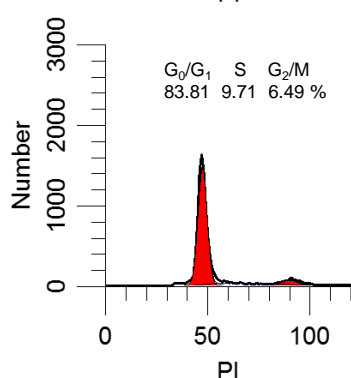

12h

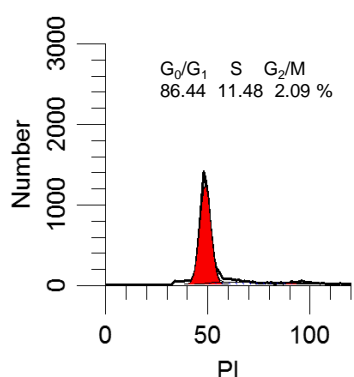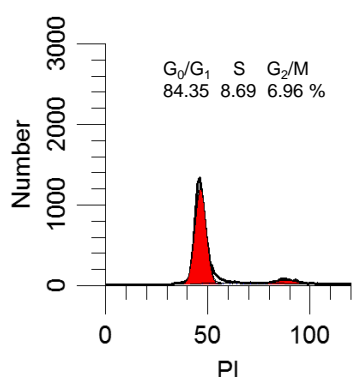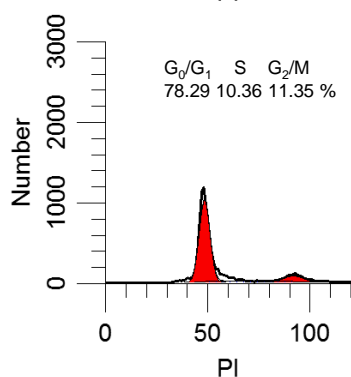

WT

KO

CD1+2

15h

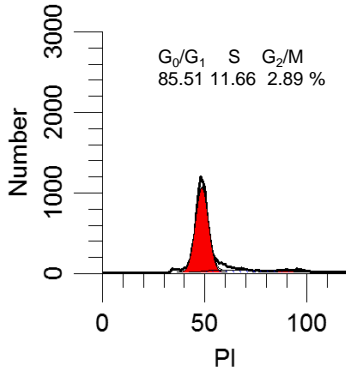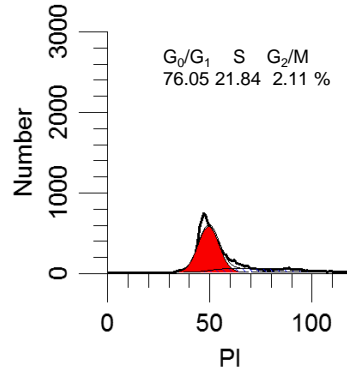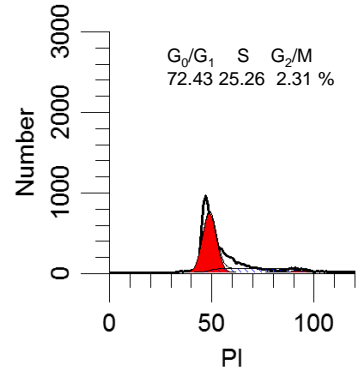

18h

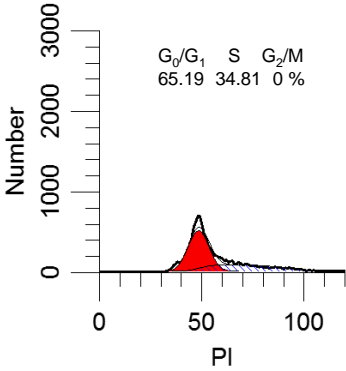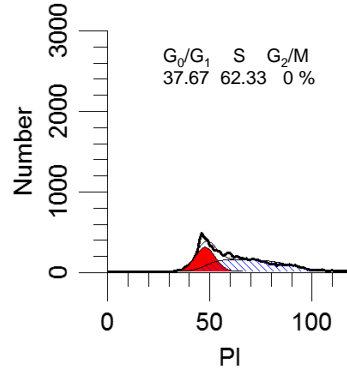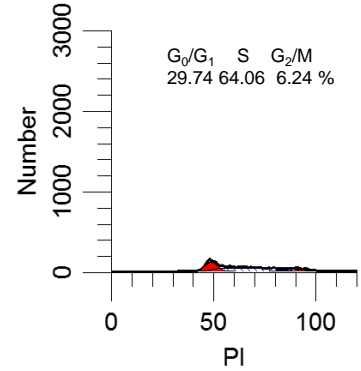

21h

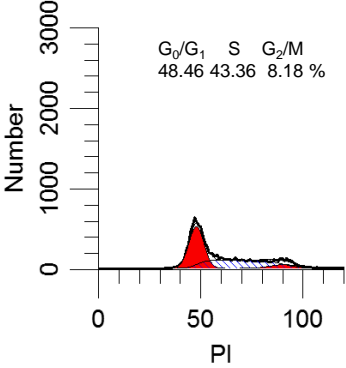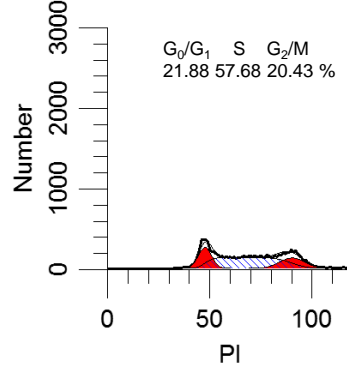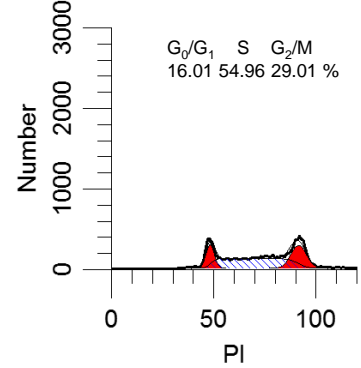

24h

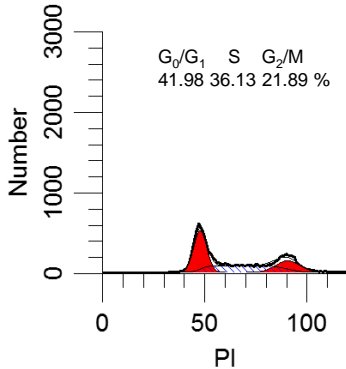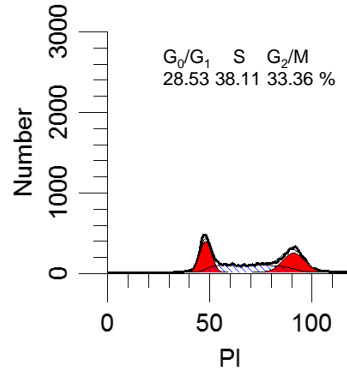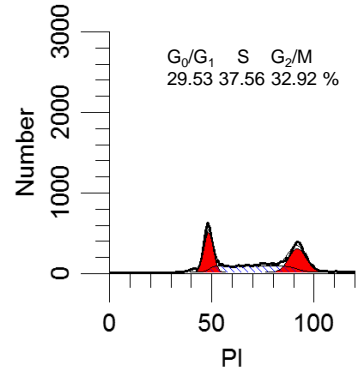

27h

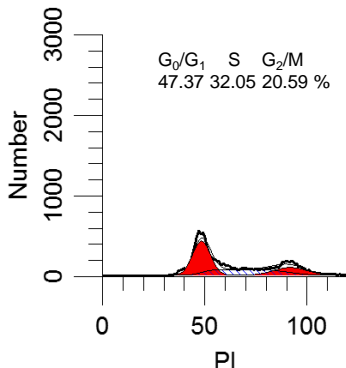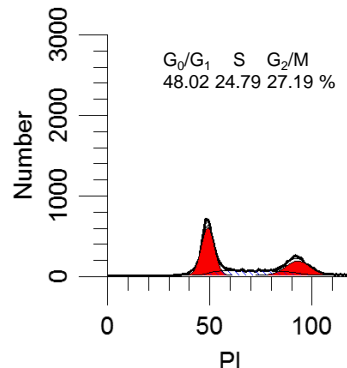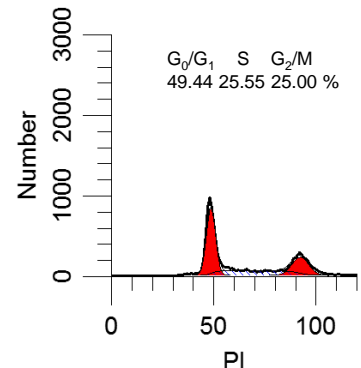

Supplement: elife-26876-fig5-data1.pdf [file elife-26876-fig5-data1.pdf]
