# Supplementary material for: The DREAM complex through its subunit Lin37 cooperates with Rb to initiate quiescence
Source: PubMed Central journal article supplement (PMC5602299; doi:10.7554/elife.26876), 2017-09-18

Figure 9-figure supplement 1

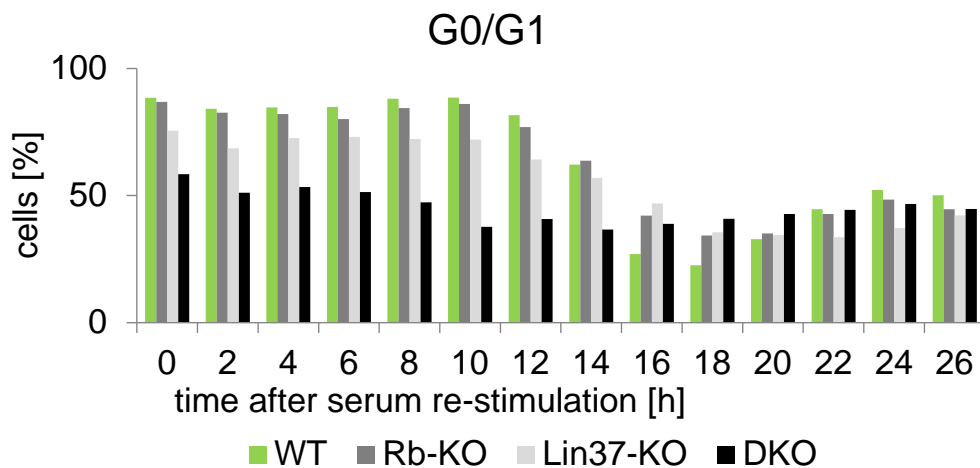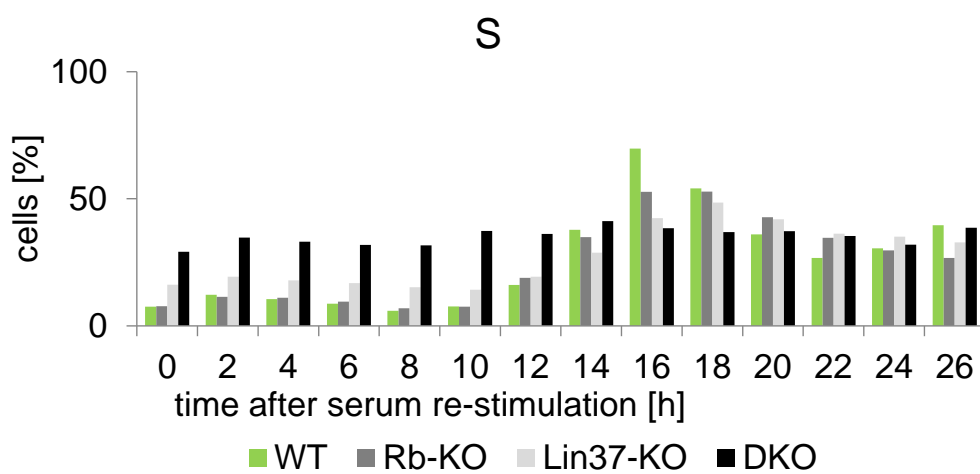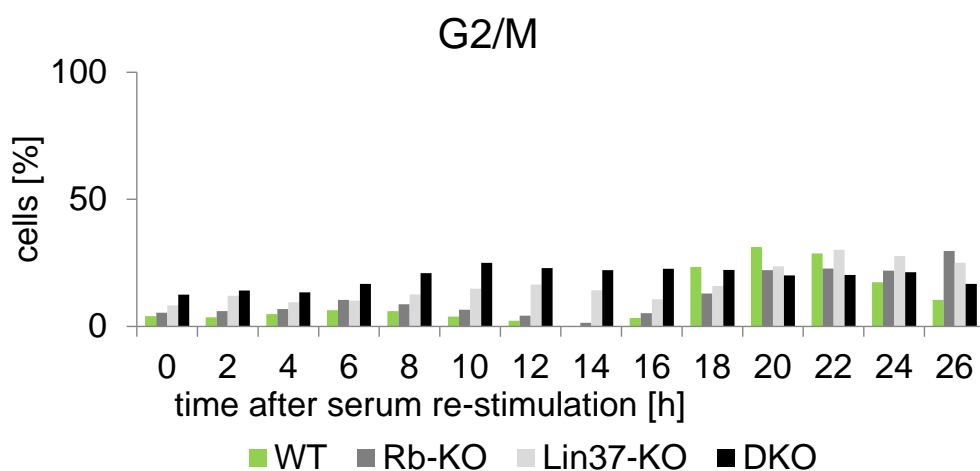

WT

Lin37<sup>-/-</sup>Rb<sup>-/-</sup>Lin37<sup>-/-</sup>/Rb<sup>-/-</sup>

0h

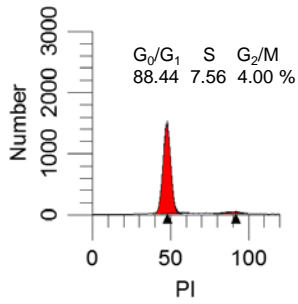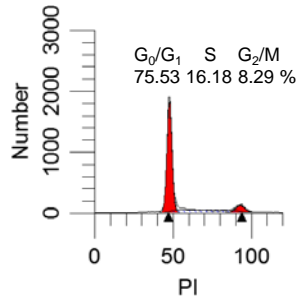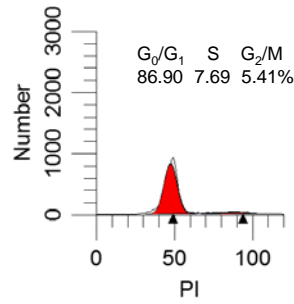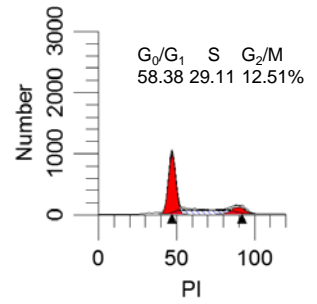

2h

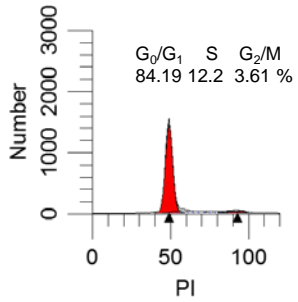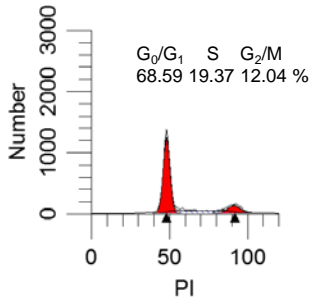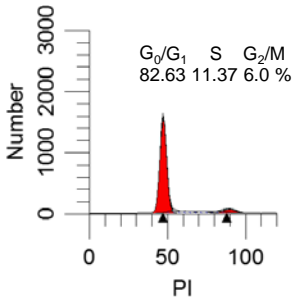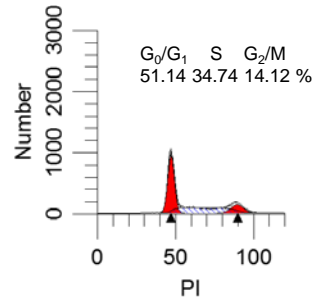

4h

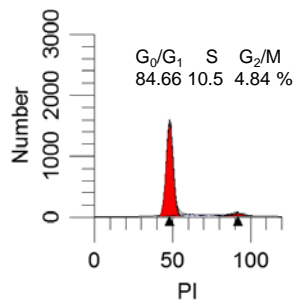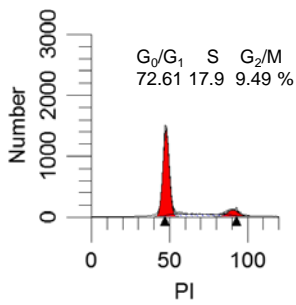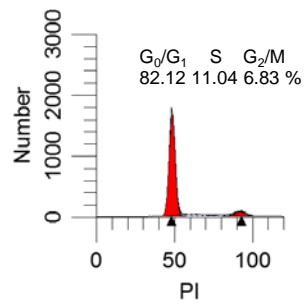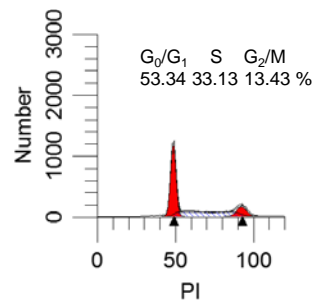

6h

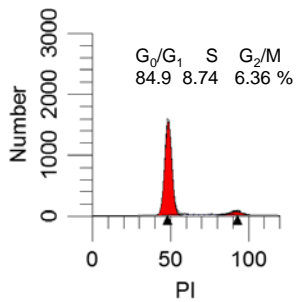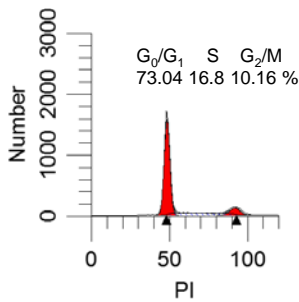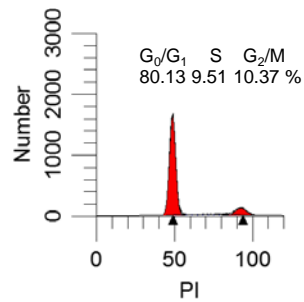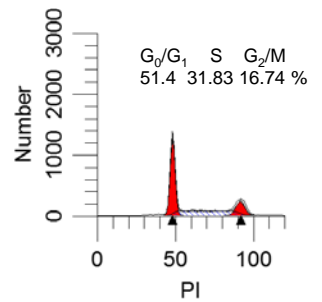

8h

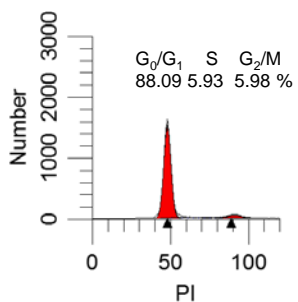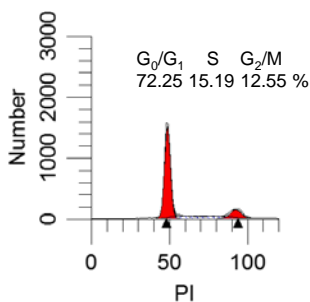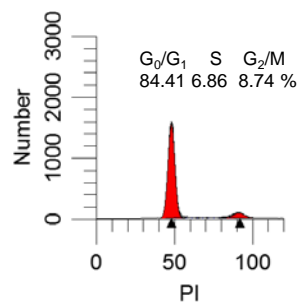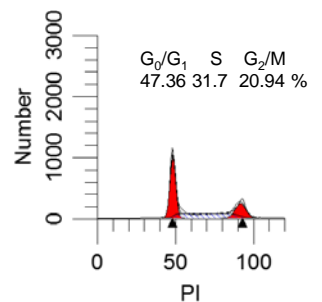

WT

Lin37<sup>-/-</sup>Rb<sup>-/-</sup>Lin37<sup>-/-</sup>/Rb<sup>-/-</sup>

10h

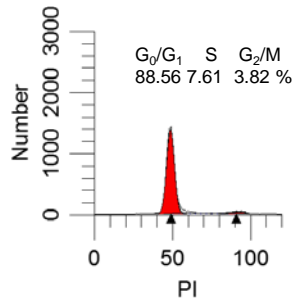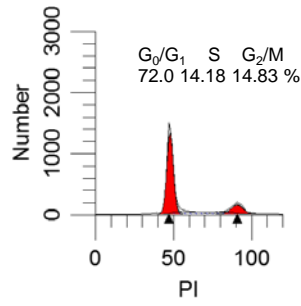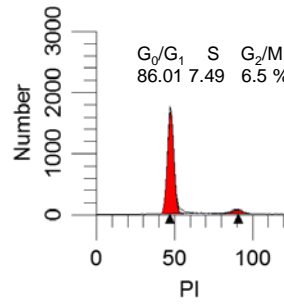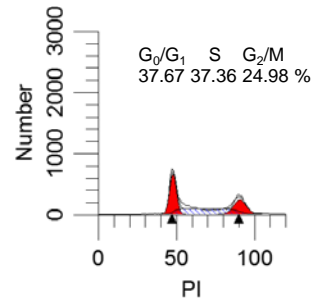

12h

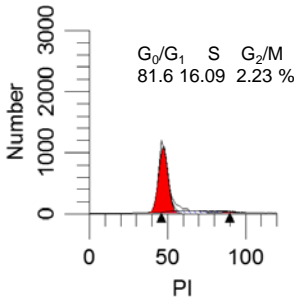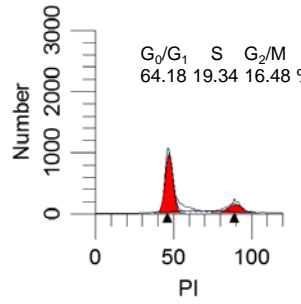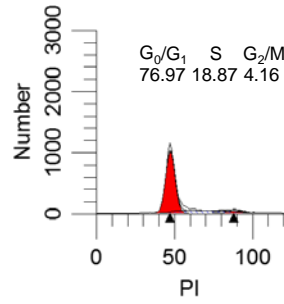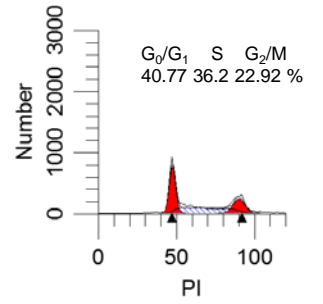

14h

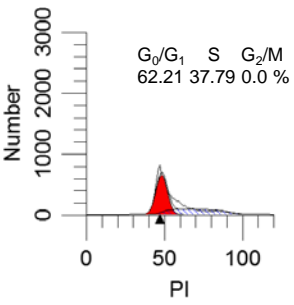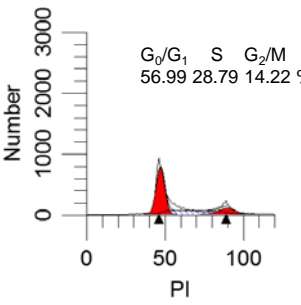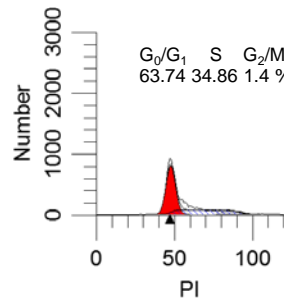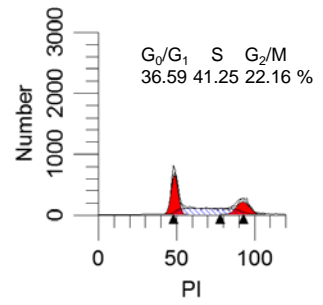

16h

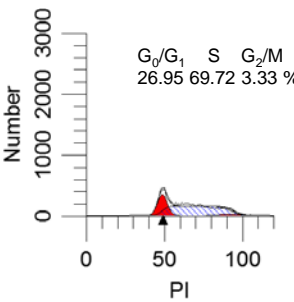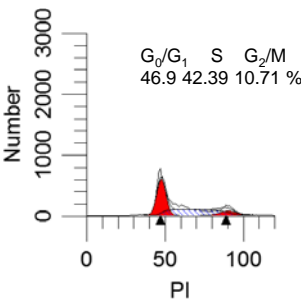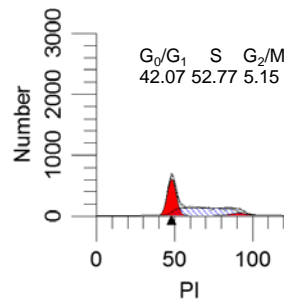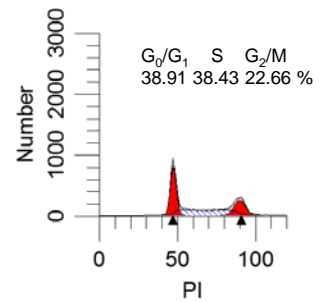

18h

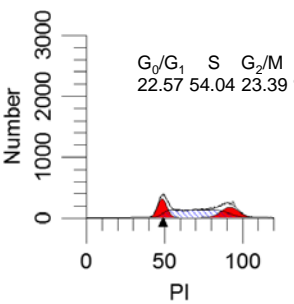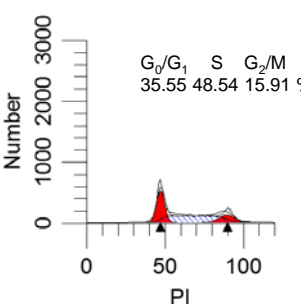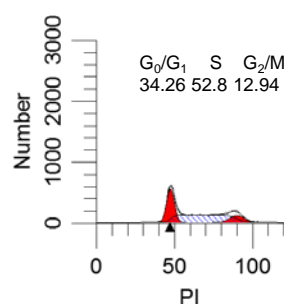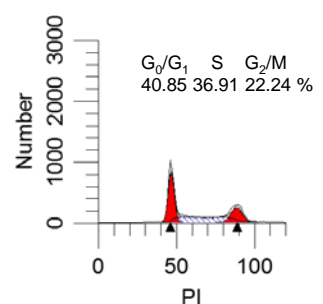

WT

Lin37<sup>-/-</sup>Rb<sup>-/-</sup>Lin37<sup>-/-</sup>/Rb<sup>-/-</sup>

20h

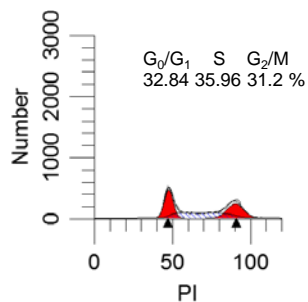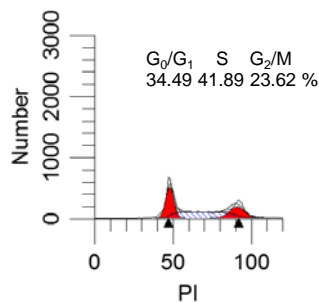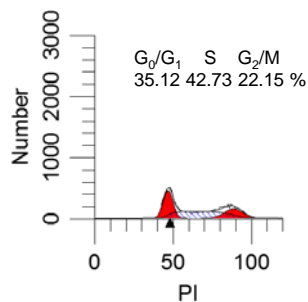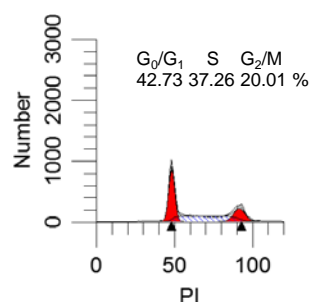

22h

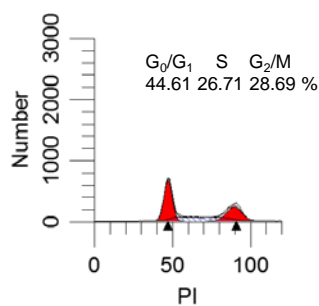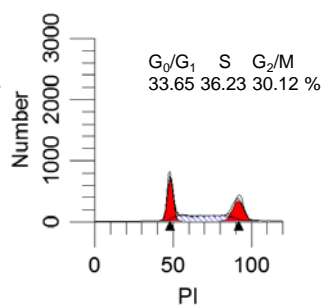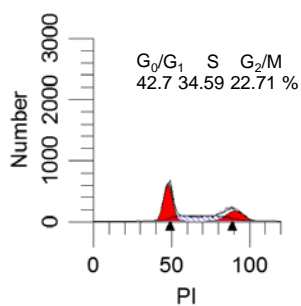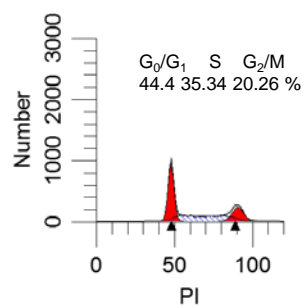

24h

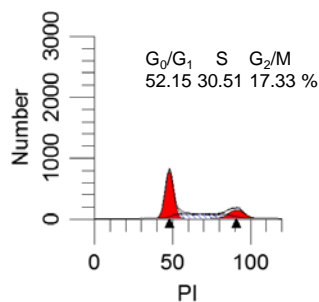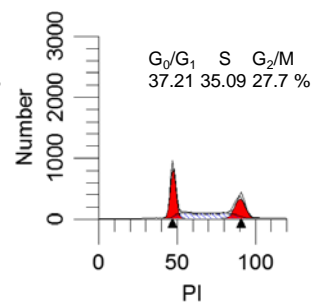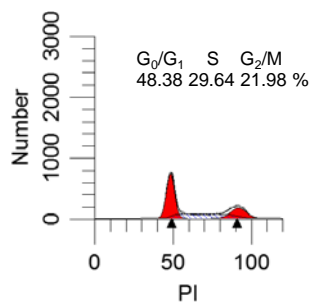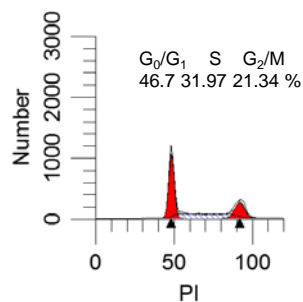

26h

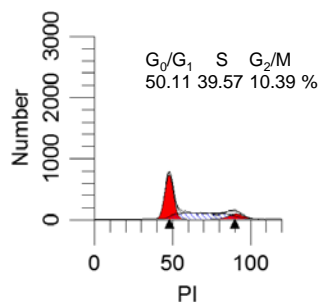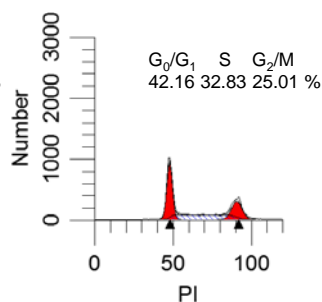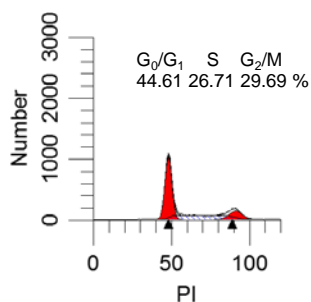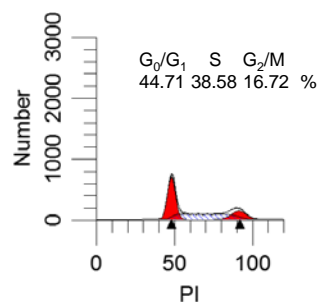

Supplement: elife-26876-fig9-data1.pdf [file elife-26876-fig9-data1.pdf]
